# Supplementary material for: Microcephaly Modeling of Kinetochore Mutation Reveals a Brain-Specific Phenotype
Source: PubMed Central journal article supplement — Cell Rep. Author manuscript; Available in PMC 2019 Feb 27. (PMC6392048; doi:10.1016/j.celrep.2018.09.032), 2018-10-09
Supplement: NIHMS1510160-supplement-1.pdf [file NIHMS1510160-supplement-1.pdf]

**Cell Reports, Volume 25**

## **Supplemental Information**

### **Microcephaly Modeling of Kinetochore**

### **Mutation Reveals a Brain-Specific Phenotype**

**Attya Omer Javed, Yun Li, Julien Muffat, Kuan-Chung Su, Malkiel A. Cohen, Tenzin Lungjangwa, Patrick Aubourg, Iain M. Cheeseman, and Rudolf Jaenisch**

## SUPPLEMENTAL FIGURES TITLES AND LEGENDS

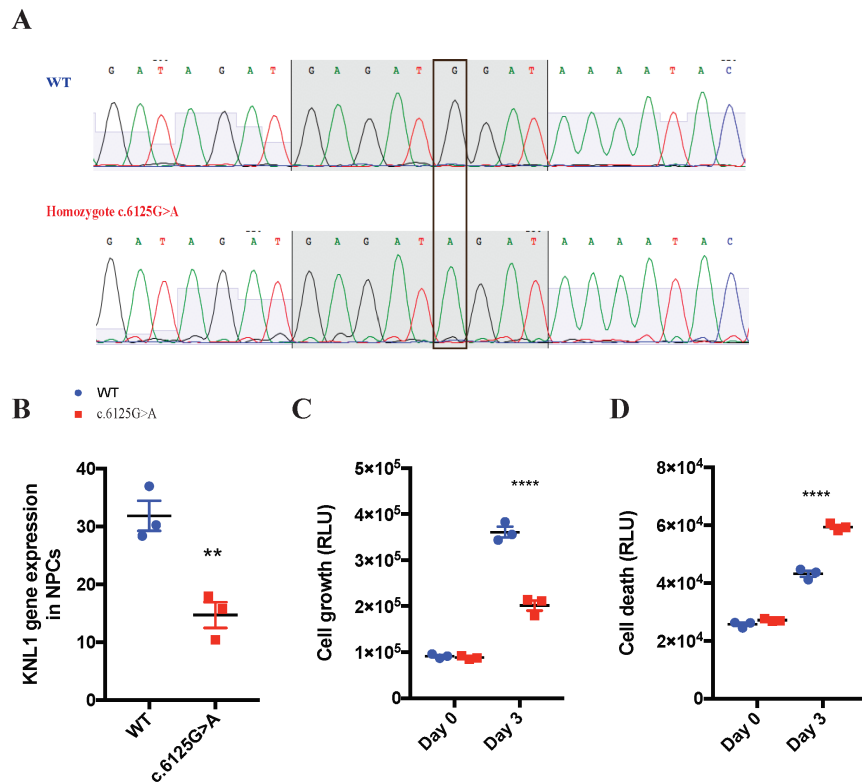

**Figure S1: Reduced KNL1 expression, cell growth and increased cell death are detected in KNL1<sup>c.6125G>A</sup> neural progenitors, derived from an iPSC line, related to Figures 1 and 2**

(A) Sanger sequencing on targeted iPSC clones, confirming a homozygous patient point mutation.

(B) Quantitative RT-PCR analysis of *KNL1* expression in neural progenitors, derived from an iPSC line, normalized to *GAPDH*. Welch's t test (two-tailed) was applied.

(C) ATP assay, represented in Relative Light Units, on a 2-D adherent neural progenitor culture, day 0 represent the plating day. ANOVA was performed followed by a post-hoc group comparisons using Bonferroni test.

(D) Apoptosis assay in WT and KNL1<sup>c.6125G>A</sup> neural progenitors, based on Caspase-3/7 activity. ANOVA was performed followed by a post-hoc group comparisons using Bonferroni test.

One non-targeted wild type clone, two wild-type clones and three patient mutation clones derived from the same CRISPR-Cas9 targeting are plotted in each graph. Results are mean +/- SEM. \*\*p<0.01, \*\*\*\*p<0.0001.

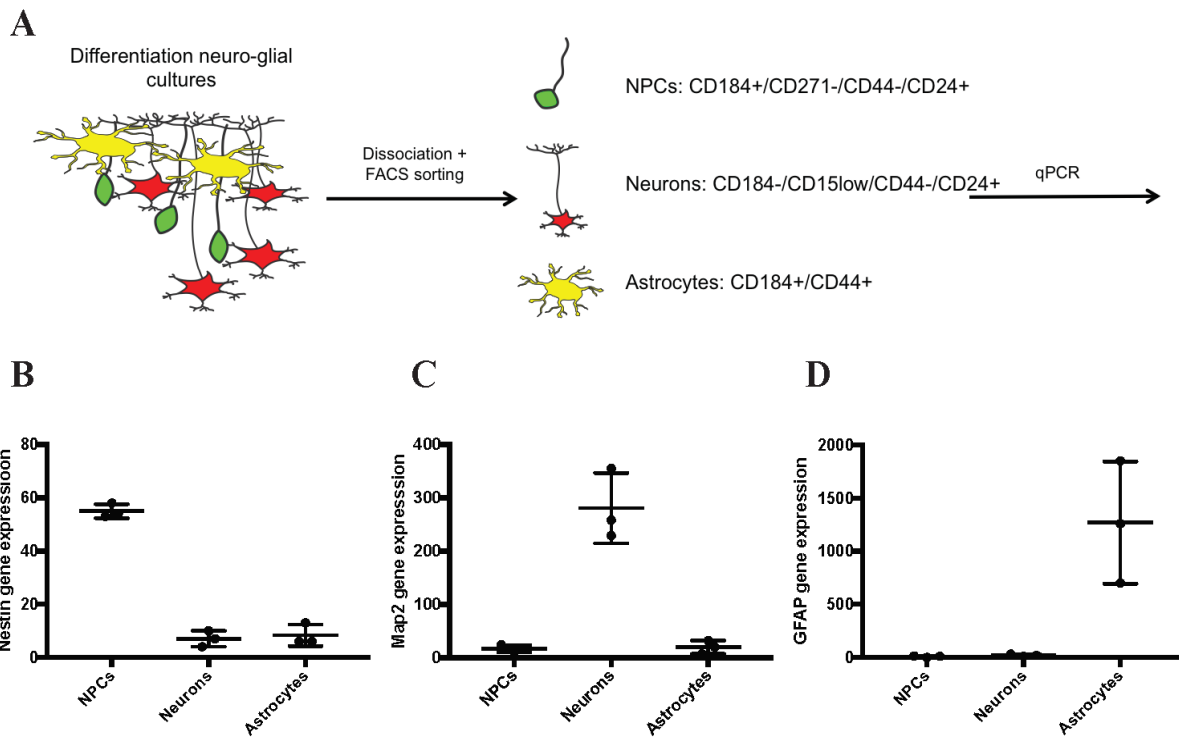

**Figure S2: Characterization of neural progenitors, neurons and astrocytes cell type sorted using FACS, based on cell surface markers, related to Figure 4**

(A) Cell surface marker used to isolate neural progenitors, neurons and astrocytes in neuro-glia 2D cultures

(B-D) Quantitative RT-PCR analysis of *NESTIN* (B), *MAP2* (C) and *GFAP* (D) expression, normalized to *GAPDH*, in the three populations identified as neural progenitors, neurons, astrocytes to confirm their identity.

One non-targeted wild type clone and two wild type clones derived from a CRISPR-Cas9 targeting are plotted in each graph. Results are mean +/- SEM.

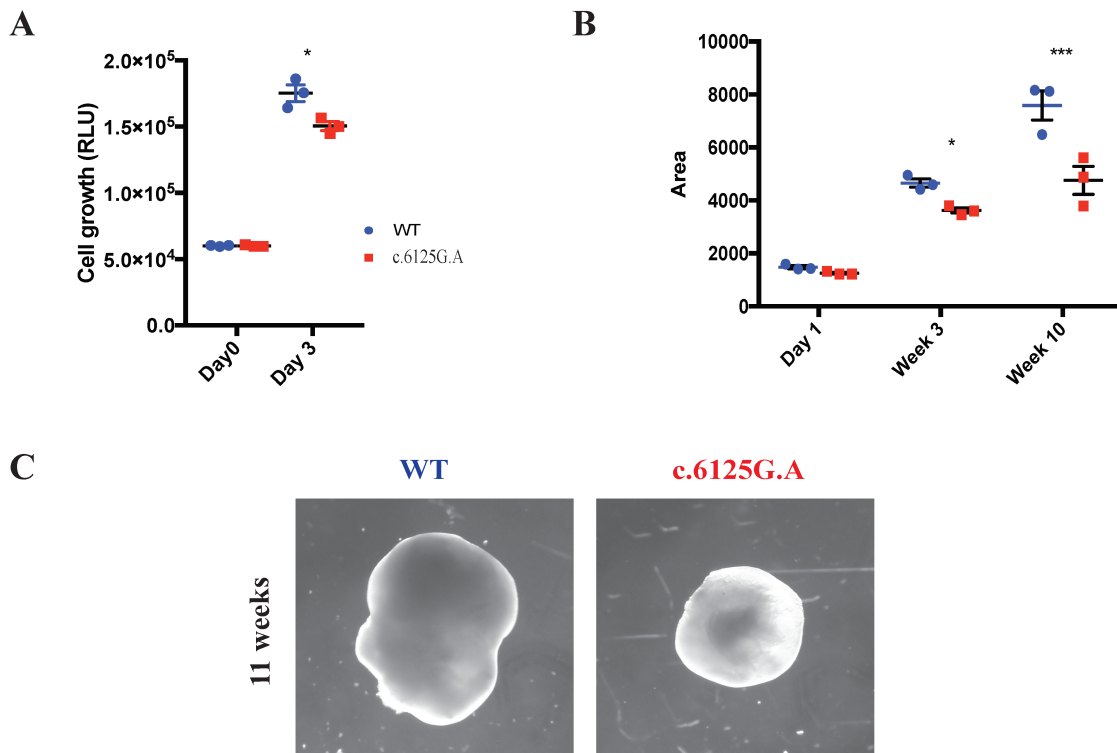

**Figure S3: Altered cell growth in  $KNL1^{c.6125G>A}$  hESCs, leading to smaller cerebral organoids, related to Figure 5**

(A) ATP assay on a 2-D adherent hESC culture. A statistical ANOVA analysis was performed followed by a post hoc group comparisons using Bonferroni test.

(B) Area measurement of WT and  $KNL1^{c.6125G>A}$  cerebral organoids in a time course of 10 weeks. ANOVA was performed followed by a post-hoc group comparisons using Bonferroni test.

(C) WT and  $KNL1^{c.6125G>A}$  cerebral organoids  $KNL1$  organoids at 11 weeks.

One non-targeted wild type clone, two wild type clones and three patient mutation clones derived from the same CRISPR-Cas9 targeting are plotted in each graph. Results are mean  $\pm$  SEM. \* $p < 0.05$ , \*\*\* $p < 0.001$ .

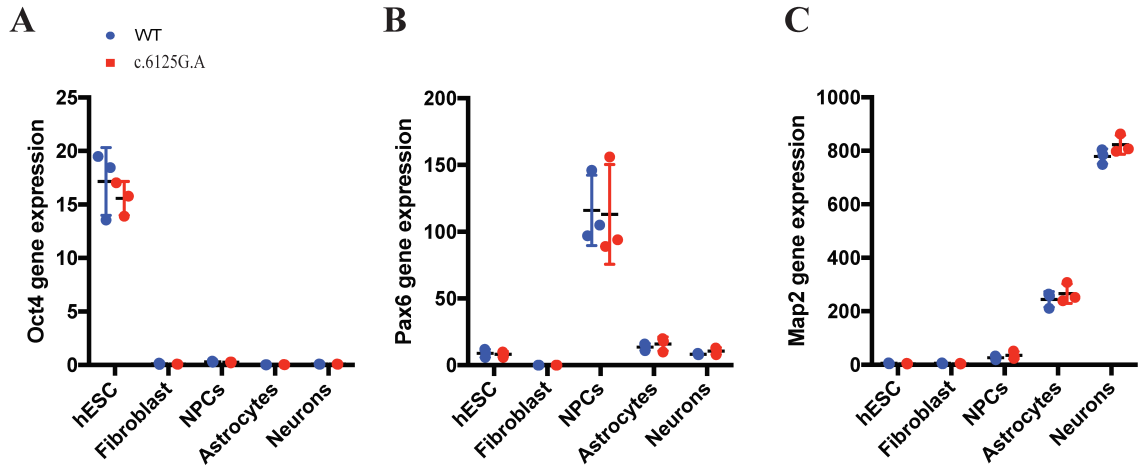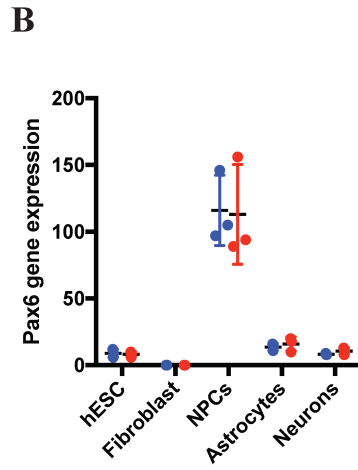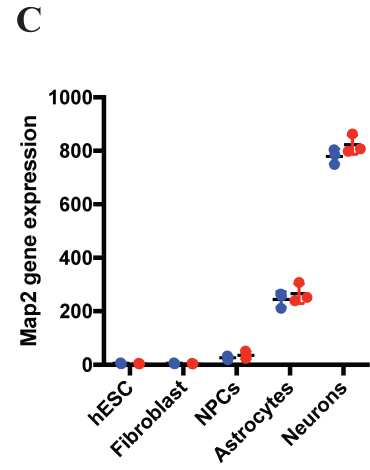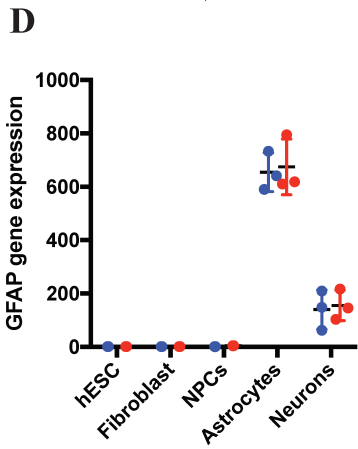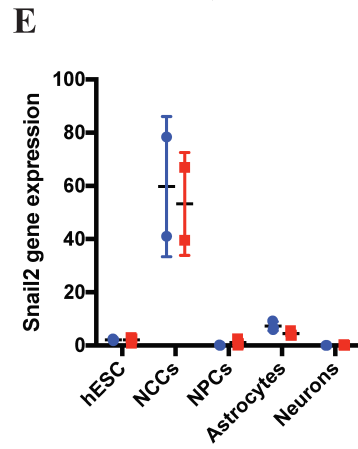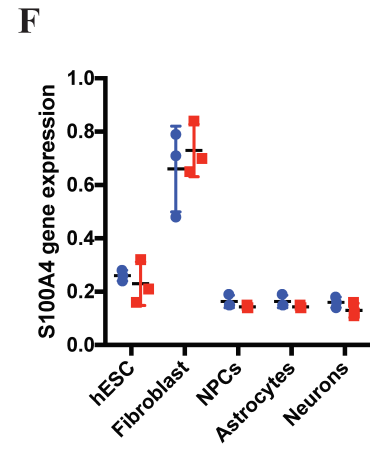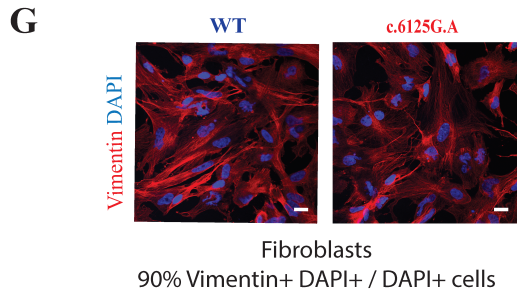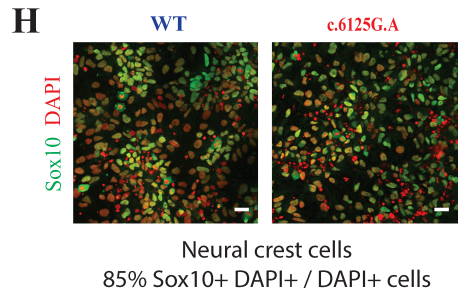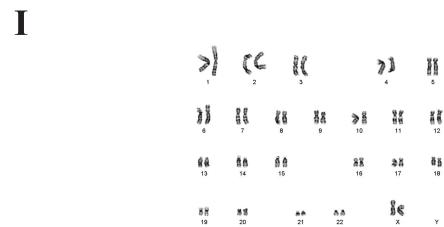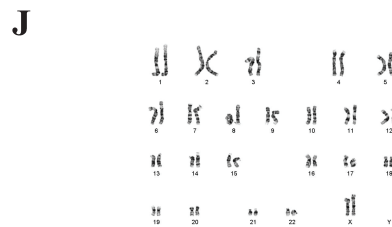

**Figure S4: Characterization of neural progenitors, neural crest cells, neurons, astrocytes and fibroblasts cell type using immunostaining and quantitative RT-PCR, related to Figure 7**

(A-E) Cell type analysis using hESC marker *OCT4* (A), neural progenitors marker *PAX6* (B); neuronal marker *MAP2* (C); glial marker *GFAP* (D); neural crest marker *SNAIL2* (E) and fibroblast marker *SI00A4* (F) using quantitative RT-PCR in WT and *KNL1<sup>c.6125G>A</sup>* neural progenitors, neural crest cells, neurons, astrocytes and fibroblasts.

(G) Immunostaining using antibodies against Vimentin (red) on WT and *KNL1<sup>c.6125G>A</sup>* fibroblast at 1-month post-differentiation (Scale bar 25  $\mu\text{m}$ ).

(H) Immunostaining using antibodies against SOX10 (green) on WT and *KNL1<sup>c.6125G>A</sup>* neural crest cells at 20 days post-differentiation (Scale bar 25  $\mu\text{m}$ ).

(I) Karyotype analysis of *KNL1<sup>c.6125G>A</sup>* fibroblasts.

(J) Karyotype analysis of *KNL1<sup>c.6125G>A</sup>* neural crest cells.

One non-targeted wild type clone, two wild type clones and three patient mutation clones derived from the same CRISPR-Cas9 targeting are plotted in each graph. Results are mean +/- SEM.

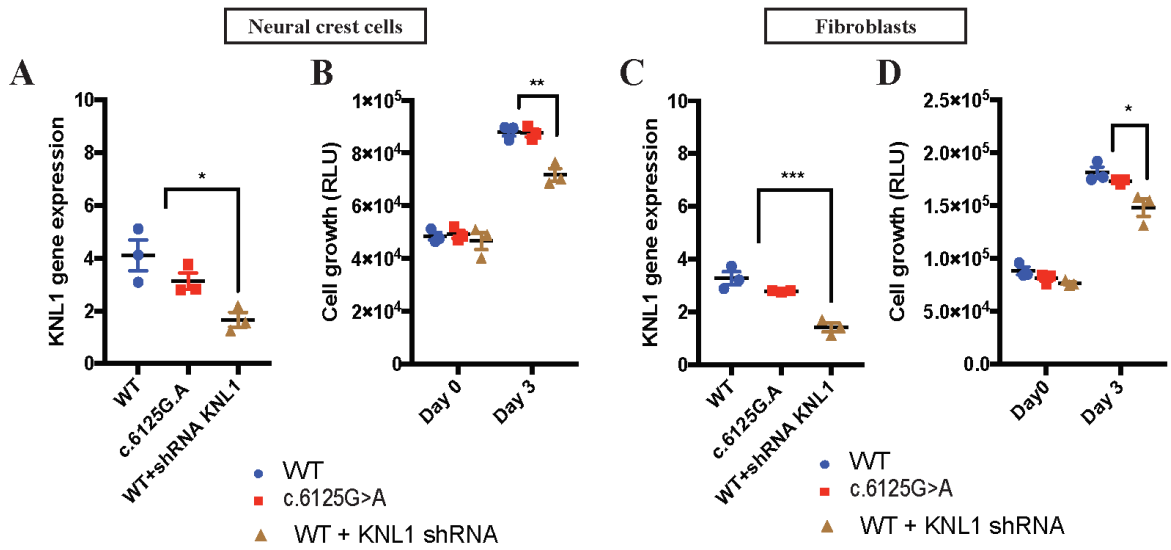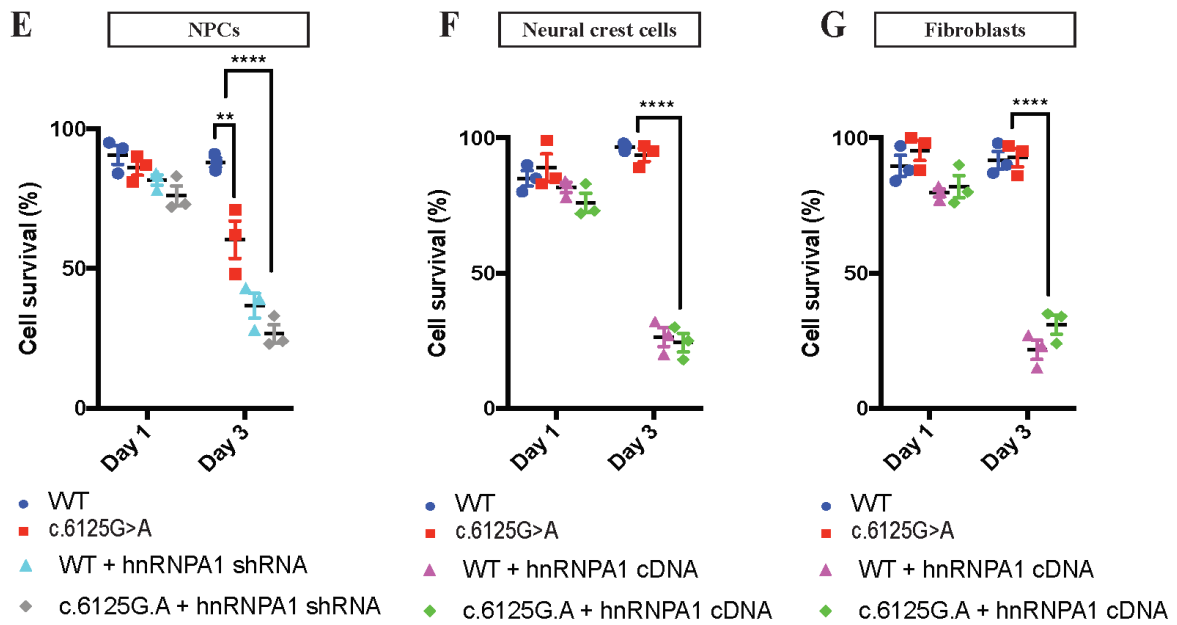

**Figure S5: Cell growth defects were mimicked in fibroblasts and neural crest cells expressing KNL1 shRNA, related to Figure 7**

(A) Quantitative RT-PCR analysis of *KNL1* expression on WT, KNL1<sup>c.6125G>A</sup>, WT shRNA neural crest cells, normalized to *GAPDH*.

(B) ATP assay, represented in Relative Light Units, on WT, KNL1<sup>c.6125G>A</sup>, WT shRNA neural crest cells, day 0 represent the plating day. ANOVA was performed followed by a post-hoc group comparisons using Bonferroni test.

(C) Quantitative RT-PCR analysis of *KNL1* expression on WT, KNL1<sup>c.6125G>A</sup>, WT shRNA fibroblasts, normalized to *GAPDH*.

(D) ATP assay, represented in Relative Light Units, on WT, KNL1<sup>c.6125G>A</sup>, WT shRNA fibroblasts, day 0 represent the plating day. ANOVA was performed followed by a post-hoc group comparisons using Bonferroni test.

(E) Cell survival analysis, based on blue trypan, of WT, KNL1<sup>c.6125G>A</sup>, WT expressing *HNRNPA1* shRNA and KNL1<sup>c.6125G>A</sup> expressing *HNRNPA1* shRNA neural progenitors, day 1 represent the post- infection day. ANOVA was performed followed by a post-hoc group comparisons using Bonferroni test.

(F) Cell survival analysis, based on blue trypan, of WT, KNL1<sup>c.6125G>A</sup>, WT expressing *HNRNPA1* cDNA and KNL1<sup>c.6125G>A</sup> expressing *HNRNPA1* cDNA neural crest cells, day 1 represent the post- infection day. ANOVA was performed followed by a post-hoc group comparisons using Bonferroni test.

(G) Cell survival analysis, based on blue trypan, of WT, KNL1<sup>c.6125G>A</sup>, WT expressing *HNRNPA1* cDNA and KNL1<sup>c.6125G>A</sup> expressing *HNRNPA1* cDNA fibroblasts, day 1 represent the post- infection day. ANOVA was performed followed by a post-hoc group comparisons using Bonferroni test.

One non-targeted wild type clone, two wild type clones and three patient mutation clones derived from the same CRISPR-Cas9 targeting are plotted in each graph. For fibroblast and neural crest, infection and transfection have been repeated in triplicates. Results are mean +/- SEM. \*p<0.05, \*\*\*p<0.001.
